# Supplementary material for: La República de Weimar: : establecimiento, estructuras y destrucción de una democracia
Source: Royal Society of Chemistry journal article supplement (doi:10.1039/c5ob01992c), 1991-01-01
Supplement: c5ob01992c1.pdf [file c5ob01992c1.pdf]

**DNA Bases Ring-Expanded with Cyclopentadiene Free Radical: A theoretical investigation  
 on Building Blocks with Diradical Characteristics**

Peiwen Zhao, Yuxiang Bu\*

*School of Chemistry and Chemical Engineering, Shandong University, Jinan, 250100, People's  
 Republic of China*

Corresponding Authors: [byx@sdu.edu.cn](mailto:byx@sdu.edu.cn)

**Electronic Supplementary Materials**

**1. Tables**

**Table S1.** The Bond Energies and Bond Lengths of Trans-r-bases. For Comparison, Data of the Natural Bases are Given

| Energy(a.u.)    | rA                              |                | rG                              |                | rC                              |                | rT                              |                |
|-----------------|---------------------------------|----------------|---------------------------------|----------------|---------------------------------|----------------|---------------------------------|----------------|
|                 | -582.34                         |                | -657.621                        |                | -509.96                         |                | -529.86                         |                |
| Bond Length (Å) | C <sub>1</sub> -C <sub>2</sub>  | 1.427<br>1.397 | C <sub>1</sub> -C <sub>2</sub>  | 1.432<br>1.393 | C <sub>1</sub> -C <sub>2</sub>  | 1.430<br>1.356 | C <sub>1</sub> -C <sub>2</sub>  | 1.425<br>1.349 |
|                 | C <sub>1</sub> -C <sub>5</sub>  | 1.474          | C <sub>1</sub> -N <sub>5</sub>  | 1.463          | C <sub>1</sub> -C <sub>4</sub>  | 1.435<br>1.440 | C <sub>1</sub> -N <sub>5</sub>  | 1.356<br>1.349 |
|                 | C <sub>1</sub> -N <sub>14</sub> | 1.33<br>1.366  | C <sub>1</sub> -N <sub>15</sub> | 1.347<br>1.356 | C <sub>1</sub> -C <sub>12</sub> | 1.395          | C <sub>1</sub> -C <sub>11</sub> | 1.438          |
|                 | C <sub>2</sub> -C <sub>3</sub>  | 1.394<br>1.409 | C <sub>2</sub> -C <sub>3</sub>  | 1.423<br>1.438 | C <sub>2</sub> -N <sub>10</sub> | 1.340          | C <sub>2</sub> -C <sub>3</sub>  | 1.445<br>1.467 |
|                 | C <sub>2</sub> -C <sub>7</sub>  | 1.436          | C <sub>2</sub> -C <sub>7</sub>  | 1.422          | C <sub>2</sub> -C <sub>13</sub> | 1.438          | C <sub>2</sub> -C <sub>10</sub> | 1.391<br>1.500 |
|                 | C <sub>3</sub> -N <sub>10</sub> | 1.356<br>1.353 | C <sub>3</sub> -O <sub>10</sub> | 1.218<br>1.213 | C <sub>3</sub> -N <sub>9</sub>  | 1.363<br>1.369 | C <sub>3</sub> -O <sub>7</sub>  | 1.214<br>1.217 |
|                 | C <sub>3</sub> -N <sub>13</sub> | 1.357<br>1.342 | C <sub>3</sub> -N <sub>14</sub> | 1.447<br>1.439 | C <sub>3</sub> -N <sub>10</sub> | 1.445<br>1.428 | C <sub>3</sub> -N <sub>9</sub>  | 1.424<br>1.407 |
|                 | C <sub>4</sub> -N <sub>13</sub> | 1.349<br>1.341 | C <sub>4</sub> -N <sub>14</sub> | 1.358<br>1.370 | C <sub>3</sub> -O <sub>11</sub> | 1.217<br>1.216 | C <sub>4</sub> -N <sub>5</sub>  | 1.406<br>1.388 |
|                 | C <sub>4</sub> -N <sub>14</sub> | 1.326<br>1.334 | C <sub>4</sub> -N <sub>15</sub> | 1.322<br>1.308 | C <sub>4</sub> -N <sub>6</sub>  | 1.355<br>1.361 | C <sub>4</sub> -N <sub>9</sub>  | 1.380<br>1.384 |
|                 | C <sub>5</sub> -N <sub>6</sub>  | 1.382          | C <sub>4</sub> -N <sub>11</sub> | 1.366<br>1.375 | C <sub>4</sub> -N <sub>9</sub>  | 1.321<br>1.317 | C <sub>4</sub> -O <sub>8</sub>  | 1.212<br>1.214 |

|  |                 |                |                 |                |                 |                |                 |                |
|--|-----------------|----------------|-----------------|----------------|-----------------|----------------|-----------------|----------------|
|  | $C_6-N_7$       | 1.428          | $C_5-C_6$       | 1.372          | $C_{12}-C_{14}$ | 1.444          | $C_{10}-C_{12}$ | 1.449          |
|  | $C_6-N_{16}$    | 1.386          | $C_6-C_7$       | 1.446          | $C_{13}-C_{14}$ | 1.378          | $C_{11}-C_{12}$ | 1.377          |
|  | $C_7-N_{15}$    | 1.357<br>1.384 | $C_6-N_{16}$    | 1.383<br>1.369 | $N_{10}-H_5$    | 1.012          | $N_5-H_{13}$    | 1.011<br>1.009 |
|  | $N_{10}-H_{11}$ | 1.007<br>1.006 | $C_7-N_{17}$    | 1.36<br>1.380  | $N_6-H_7$       | 1.005<br>1.005 | $N_9-H_6$       | 1.012<br>1.013 |
|  | $N_{15}-H_{17}$ | 1.329<br>1.308 | $N_{16}-C_{18}$ | 1.382<br>1.385 |                 |                |                 |                |
|  | $N_{16}-C_{17}$ | 1.376<br>1.380 | $N_{17}-C_{18}$ | 1.322<br>1.304 |                 |                |                 |                |
|  | $N_{16}-H_{18}$ | 1.007<br>1.008 | $N_{11}-H_{11}$ | 1.01<br>1.01   |                 |                |                 |                |
|  |                 |                | $N_{11}-H_{12}$ | 1.01<br>1.01   |                 |                |                 |                |
|  |                 |                | $N_{16}-H_{20}$ | 1.01<br>1.01   |                 |                |                 |                |

**Table S2.** Binding Energies (kcal /mol<sup>-1</sup>) of Natural Bases and Trans-r-bases

| BP  | BE     | BP    | BE     |
|-----|--------|-------|--------|
| G-C | -25.72 | rG-C  | -26.82 |
|     |        | G-rC  | -25.06 |
|     |        | rG-rC | -26.10 |
| A-T | -12.67 | rA-T  | -12.00 |
|     |        | A-rT  | -12.75 |
|     |        | rA-rT | -12.40 |

**Table S3.** (AIP, VIP) and (AEA, VEA) of the Natural Bases and Trans-r-bases (eV)

| Bases | AIP  | VIP  | AEA   | VEA   |
|-------|------|------|-------|-------|
| T     | 8.81 | 9.05 | 0.01  | -0.24 |
| A     | 7.55 | 8.01 | -0.16 | -0.31 |
| G     | 8.11 | 8.31 | -0.33 | -0.45 |
| C     | 8.63 | 8.75 | -0.11 | -0.26 |
| rT    | 7.88 | 8.24 | 2.58  | 2.28  |
| rG    | 6.66 | 7.79 | 2.05  | 2.07  |
| rA    | 6.97 | 7.24 | 2.06  | 1.61  |
| rC    | 7.45 | 8.52 | 2.37  | 2.48  |

**Table S4.** The Frontier Orbital Energies and Corresponding Energy Gaps of Trans-r-bases

| Bases | HOMO  | LUMO  | Gaps | r-Bases | SOMO  | LUMO  | Gaps |
|-------|-------|-------|------|---------|-------|-------|------|
| G     | -6.12 | -0.87 | 5.25 | rG      | -5.26 | -0.82 | 4.44 |
| A     | -6.34 | -0.99 | 5.35 | rA      | -5.44 | -0.74 | 4.70 |
| C     | -6.67 | -1.28 | 5.39 | rC      | -5.87 | -1.27 | 4.60 |
| T     | -6.99 | -1.58 | 5.42 | rT      | -6.26 | -1.25 | 5.01 |

**Table S5.** Frontier Orbitals Occupation Numbers of Open-Shell Singlet States, Magnetic Exchange Coupling Constants ( $J$  in  $\text{cm}^{-1}$ ) of the Overlap-Stacking Trans-r-base Pairs. Four Different  $J$  Values Represent Situations in Trans-r-base Pairs ( $J$ ), Rise Changes in Trans-r-base Pairs ( $J'$ ) and r-base Pairs ( $J^*$ )

| Groups            | BPs       | Occupation Numbers |       | J Values( $\text{cm}^{-1}$ ) |        |         |
|-------------------|-----------|--------------------|-------|------------------------------|--------|---------|
|                   |           | HOMO               | LUMO  | J                            | J'     | J*      |
| 3'-rPu/<br>5'-rPu | rG-C/rG-C | 1.167              | 0.901 | -1449.6                      | -24.7  | 16.4    |
|                   | rG-C/rA-T | 1.102              | 0.856 | -1670.0                      | -55.2  | 32.1    |
|                   | rA-T/rA-T | 1.270              | 0.730 | -284.7                       | -68.2  | 28.4    |
|                   | rA-T/rG-C | 1.077              | 0.923 | -355.9                       | -26.0  | 108.3   |
| 3'-rPy/<br>5'-rPy | G-rC/G-rC | 1.948              | 0.828 | -126.0                       | -103.8 | -226.0  |
|                   | G-rC/A-rT | 1.950              | 0.769 | 290.8                        | -36.0  | -184.8  |
|                   | A-rT/A-rT | 1.234              | 0.768 | -352.4                       | -195.8 | -194.4  |
|                   | A-rT/G-rC | 1.102              | 0.900 | -76.2                        | -39.4  | -326.4  |
| 3'-rPu/<br>5'-rPy | rG-C/rC-G | 1.057              | 0.943 | 0.13                         | 177.6  | -8.3    |
|                   | rG-C/rT-A | 1.044              | 0.955 | -80.9                        | 206.8  | -9.9    |
|                   | rA-T/rT-A | 1.265              | 0.735 | -164.7                       | -73.6  | -16.0   |
|                   | rA-T/rC-G | 1.212              | 0.788 | 474.7                        | -233.0 | -8.2    |
| 3'-rPy/<br>5'-rPu | rC-G/rG-C | 1.099              | 0.901 | -175.9                       | -291.1 | -1075.1 |
|                   | rC-G/rA-T | 1.180              | 0.823 | -107.2                       | 2.05   | -425.9  |
|                   | rT-A/rA-T | 1.157              | 0.843 | -155.9                       | -917.9 | -359.8  |
|                   | rT-A/rG-C | 1.103              | 0.897 | -51.9                        | -67.1  | -695.9  |

**Table S6.** Frontier Orbitals Occupation Numbers of Open-Shell Singlet States, Magnetic Exchange Coupling Constants ( $J$  in  $\text{cm}^{-1}$ ) of the Cross-Stacking Diradical Base Pairs. Four Different  $J$  Values Represent Situations in Trans-r-base Pairs ( $J$ ), Rise Changes in Trans-r-base Pairs ( $J''$ ) and r-base Pairs ( $J^*$ )

| Groups            | BPs       | Occupation Numbers |       | J Values |        |       |
|-------------------|-----------|--------------------|-------|----------|--------|-------|
|                   |           | HOMO               | LUMO  | J        | $J''$  | $J^*$ |
| 3'-rPu            | rG-C/C-rG | 1.001              | 0.999 | 12.2     | -294.8 | -5.2  |
|                   | rG-C/T-rA | 1.000              | 1.000 | 1.2      | 31.7   | -11.1 |
|                   | rA-T/T-rA | 1.020              | 0.981 | 0.0      | 229.9  | -24.3 |
| 5'-rPu            | C-rG/rG-C | 1.012              | 0.988 | -11.5    | -326.4 | -0.2  |
|                   | T-rA/rG-C | 0.999              | 1.000 | -2.0     | -28.7  | 0.0   |
|                   | T-rA/rA-T | 1.000              | 0.999 | 0.0      | -71.3  | 0.0   |
| 3'-rPy            | rC-G/G-rC | 0.998              | 1.004 | -0.8     | -494.9 | 0.0   |
|                   | rC-G/A-rT | 1.000              | 1.002 | -0.1     | 96.7   | 0.0   |
|                   | rT-A/A-rT | 1.000              | 0.999 | 0.0      | 0.0    | 0.0   |
| 5'-rPy            | G-rC/rC-G | 1.000              | 1.002 | 0.2      | -40.0  | 0.0   |
|                   | G-rC/rT-A | 1.000              | 1.000 | 0.0      | -24.4  | 0.0   |
|                   | A-rT/rT-A | 1.001              | 1.000 | 0.0      | 177.6  | 0.0   |
| 3'-rPu/<br>3'-rPy | rG-C/G-rC | 1.013              | 0.987 | -103.8   | -92.4  | -0.4  |
|                   | rG-C/A-rT | 1.013              | 0.987 | -158.5   | 50.3   | -3.6  |
|                   | rA-T/A-rT | 1.000              | 1.000 | 0.0      | 0.0    | -1.7  |
|                   | rA-T/G-rC | 1.003              | 0.998 | 0.4      | -52.2  | -0.4  |
| 5'-rPy/<br>5'-rPu | G-rC/rG-C | 1.000              | 0.999 | -385.5   | -127.3 | -0.1  |
|                   | G-rC/rA-T | 1.029              | 0.972 | -107.2   | 20.1   | 0.0   |
|                   | A-rT/rA-T | 1.000              | 1.000 | 0.0      | 52.9   | 0.0   |
|                   | A-rT/rG-C | 1.010              | 0.991 | -169.3   | -66.1  | 0.0   |

**Table S7.** Energies (in au, the Energies of the Closed-Shell States are Used as Benchmark) of the Tetra-Radical Two-layered Trans-r-base Pairs

| Groups            | BPs         | Energies        |                |                 |
|-------------------|-------------|-----------------|----------------|-----------------|
|                   |             | E <sub>BS</sub> | E <sub>T</sub> | E <sub>CS</sub> |
| Overlap           | rG-rC/rG-rC | -2335.201       | -2335.206      | -2335.178       |
|                   | rG-rC/rA-rT | -2279.804       | -2279.810      | -2279.788       |
|                   | rA-rT/rA-rT | -2224.347       | -2224.330      | -2224.347       |
|                   | rA-rT/rG-rC | -2279.794       | -2279.810      | -2279.794       |
| 3'-rPu/<br>5'-rPy | rG-rC/rC-rG | -2335.198       | -2335.193      | -2335.198       |
|                   | rG-rC/rT-rA | -2279.801       | -2279.810      | -2279.786       |
|                   | rA-rT/rT-rA | -2224.338       | -2224.336      | -2224.334       |
| 3'-rPy/<br>5'-rPu | rC-rG/rG-rC | -2335.143       | -2335.142      | -2335.135       |
|                   | rC-rG/rA-rT | -2279.810       | -2279.786      | -2279.804       |
|                   | rT-rA/rA-rT | -2224.404       | -2224.401      | -2224.394       |

**Table S8.** Frontier Orbitals Occupation Numbers of Open-Shell Singlet States of Tetra-Radical Two-layered Trans-r-base Pairs

| Groups            | BPs         | HOMO-1 | HOMO  | LUMO  | LUMO+1 |
|-------------------|-------------|--------|-------|-------|--------|
| Overlap           | rG-rC/rG-rC | 1.214  | 1.126 | 0.896 | 0.973  |
|                   | rG-rC/rA-rT | 1.140  | 1.434 | 0.860 | 0.566  |
|                   | rA-rT/rA-rT | 1.716  | 1.941 | 0.307 | 0.289  |
|                   | rA-rT/rG-rC | 1.175  | 1.245 | 0.825 | 0.754  |
| 3'-rPu/<br>5'-rPy | rG-rC/rC-rG | 1.362  | 1.142 | 0.858 | 0.638  |
|                   | rG-rC/rT-rA | 1.140  | 1.434 | 0.860 | 0.566  |
|                   | rA-rT/rT-rA | 1.452  | 1.324 | 0.679 | 0.548  |
| 3'-rPy/<br>5'-rPu | rC-rG/rG-rC | 1.151  | 1.341 | 0.959 | 0.721  |
|                   | rC-rG/rA-rT | 1.612  | 1.402 | 0.387 | 0.598  |
|                   | rT-rA/rA-rT | 1.463  | 1.321 | 0.679 | 0.537  |

**Table S9.** Frontier Orbitals Occupation Numbers of Open-Shell Singlet States of Tetra-Radical Two-layered Trans-r-base Pairs after Adjust the Rise

| Groups            | BPs         | HOMO-1 | HOMO  | LUMO  | LUMO+1 |
|-------------------|-------------|--------|-------|-------|--------|
| Overlap           | rG-rC/rG-rC | 1.189  | 1.097 | 0.903 | 0.878  |
|                   | rG-rC/rA-rT | 1.115  | 1.325 | 0.885 | 0.675  |
|                   | rA-rT/rA-rT | 1.970  | 1.318 | 0.437 | 0.682  |
|                   | rA-rT/rG-rC | --     | --    | --    | --     |
| 3'-rPu/<br>5'-rPy | rG-rC/rC-rG | 1.238  | 1.178 | 0.822 | 0.762  |
|                   | rG-rC/rT-rA | 0.995  | 1.000 | 1.000 | 1.005  |
|                   | rA-rT/rT-rA | 1.193  | 1.163 | 0.837 | 0.809  |
| 3'-rPy/<br>5'-rPu | rC-rG/rG-rC | 1.389  | 1.490 | 0.611 | 0.513  |
|                   | rC-rG/rA-rT | 0.979  | 1.574 | 1.021 | 0.427  |
|                   | rT-rA/rA-rT | --     | --    | --    | --     |

**Table S10.** Energy Order and Magnetic Exchange Coupling Constants (J in cm<sup>-1</sup>) of Part Two-layered Trans-r-base Pairs. Open-Shell Singlet States calculated with UB3LYP/6-311++G\*\* and UM062X/6-311++G\*\*

| BPs       | UB3LYP/6-311++G**                                |        | UM062X/6-311++G**                                |        |
|-----------|--------------------------------------------------|--------|--------------------------------------------------|--------|
|           | Energy Order                                     | J      | Energy Order                                     | J      |
| rT-A/rA-T | E <sub>BS</sub> <E <sub>T</sub> <E <sub>CS</sub> | -155.9 | E <sub>BS</sub> <E <sub>T</sub> <E <sub>CS</sub> | -190.8 |
| rT-A/rG-C | E <sub>BS</sub> <E <sub>T</sub> <E <sub>CS</sub> | -51.9  | E <sub>BS</sub> <E <sub>T</sub> <E <sub>CS</sub> | -91.9  |
| rC-G/G-rC | E <sub>BS</sub> <E <sub>T</sub> <E <sub>CS</sub> | -0.8   | E <sub>BS</sub> <E <sub>T</sub> <E <sub>CS</sub> | -0.4   |
| rA-T/T-rA | E <sub>BS</sub> <E <sub>T</sub> <E <sub>CS</sub> | 0.0    | E <sub>BS</sub> <E <sub>T</sub> <E <sub>CS</sub> | -1.0   |
| rC-G/rA-T | E <sub>BS</sub> <E <sub>T</sub> <E <sub>CS</sub> | -107.2 | E <sub>BS</sub> <E <sub>T</sub> <E <sub>CS</sub> | -107.9 |
| C-rG/rG-C | E <sub>BS</sub> <E <sub>T</sub> <E <sub>CS</sub> | -11.5  | E <sub>BS</sub> <E <sub>T</sub> <E <sub>CS</sub> | -5.1   |
| A-rT/G-rC | E <sub>BS</sub> <E <sub>T</sub> <E <sub>CS</sub> | -76.2  | E <sub>BS</sub> <E <sub>T</sub> <E <sub>CS</sub> | -97.2  |
| T-rA/rA-T | E <sub>T</sub> <E <sub>BS</sub> <E <sub>CS</sub> | 0.0    | E <sub>BS</sub> ~E <sub>T</sub> <E <sub>CS</sub> | 0.0    |

**Table S11.** Frontier Orbitals Occupation Numbers of Open-Shell Singlet States of part Two-layered Trans-r-base Pairs calculated with the CASSCF(10,10)/6-311+G\* and CASSCF(8,8)/6-311+G\* Methods

| BPs       | CASSCF(10,10)/6-311+G* |      |      |        | CASSCF(8,8)/6-31+G* |      |      |        |
|-----------|------------------------|------|------|--------|---------------------|------|------|--------|
|           | HOMO+1                 | HOMO | LUMO | LUMO-1 | HOMO+1              | HOMO | LUMO | LUMO-1 |
| rT-A/rA-T | 2.00                   | 1.16 | 0.84 | 0      | 2.00                | 1.16 | 0.84 | 0      |
| rT-A/rG-C | 2.00                   | 1.10 | 0.90 | 0      | 2.00                | 1.10 | 0.90 | 0      |
| rC-G/G-rC | 2.00                   | 1.00 | 1.00 | 0      | 2.00                | 1.00 | 1.00 | 0      |
| rA-T/T-rA | 2.00                   | 1.01 | 0.99 | 0      | 2.00                | 1.02 | 0.98 | 0      |
| rC-G/rA-T | 2.00                   | 1.17 | 0.83 | 0      | 2.00                | 1.18 | 0.82 | 0      |
| C-rG/rG-C | 2.00                   | 1.02 | 0.98 | 0      | 2.00                | 1.01 | 0.99 | 0      |
| A-rT/G-rC | 2.00                   | 1.10 | 0.90 | 0      | 2.00                | 1.10 | 0.90 | 0      |
| T-rA/rA-T | 2.00                   | 1.00 | 1.00 | 0      | 2.00                | 1.00 | 1.00 | 0      |

**The Spin Densities Distributions of Expanded Trans-r-bases and Trans-r-base Pairs.**

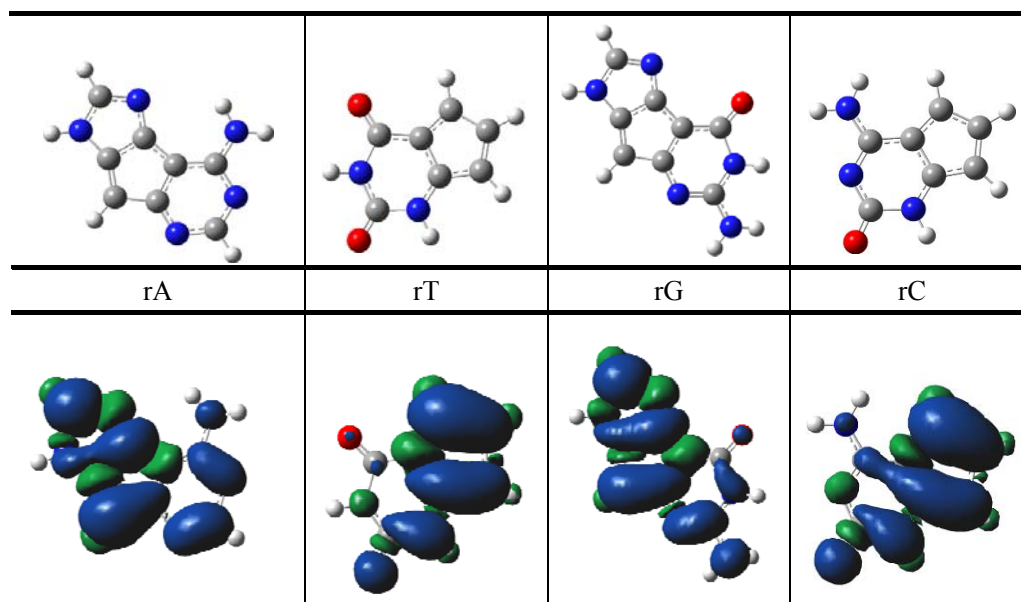

**Figure S1.** The spin densities distributions of optimized trans-r-bases



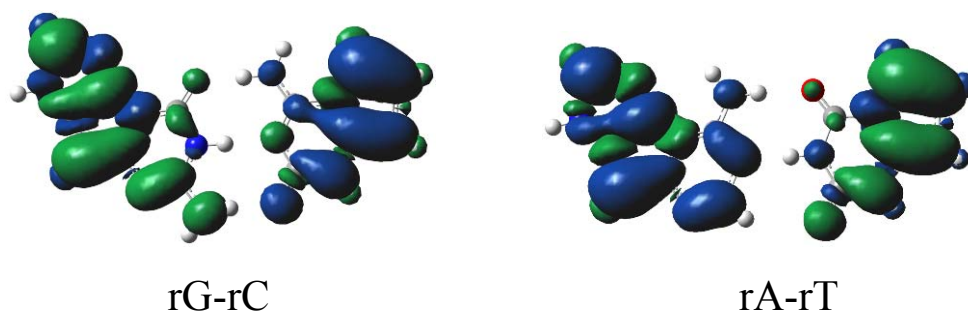

**Figure S2.** The spin densities distributions of optimized trans-r-base pairs

**Spin Densities Distributions in Overlap-Stacking Diradical Base Pairs.**

rG-C/rG-C (BS)

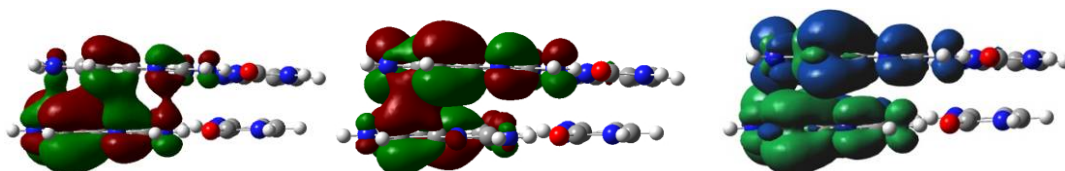

rG-C/rG-C (T)

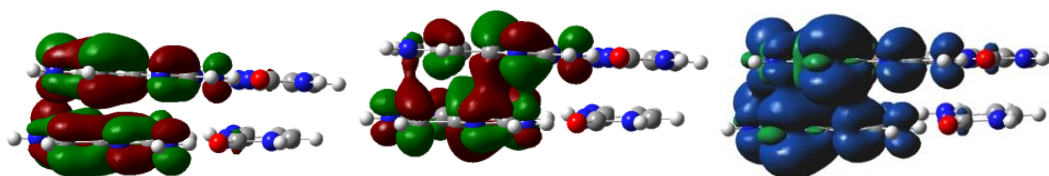

rG-C/rA-T (BS)

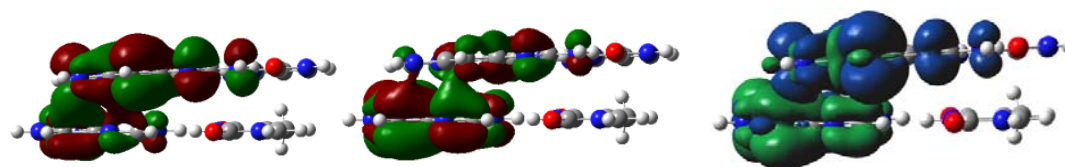

rG-C/rA-T (T)

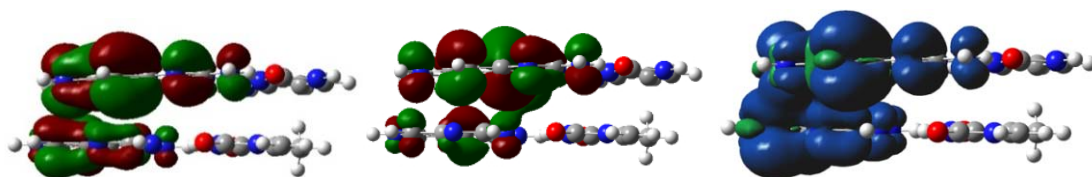

rA-T/rA-T (BS)

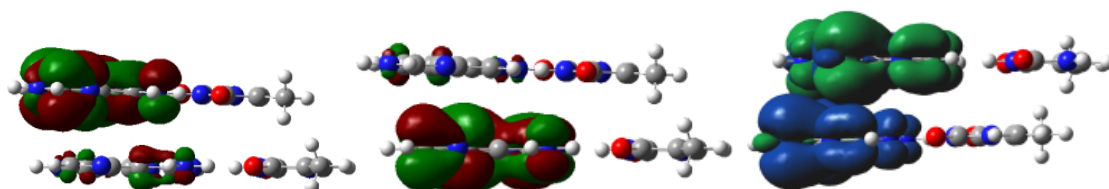

rA-T/rA-T (T)

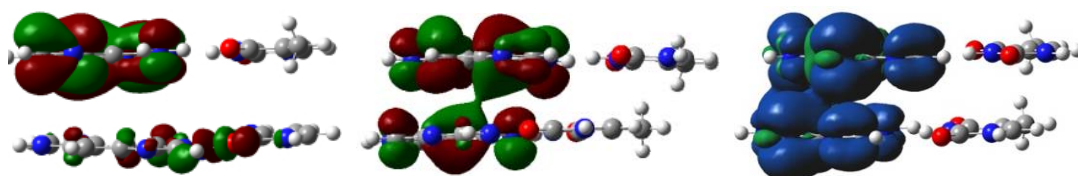

rA-T/rG-C (BS)

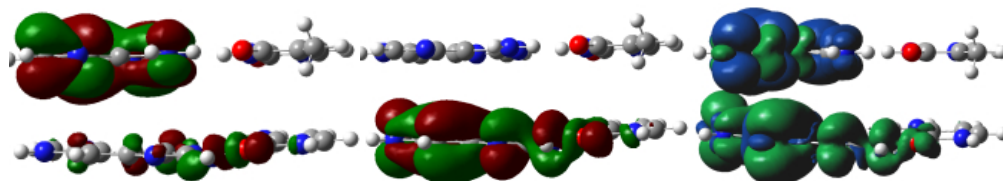

rA-T/rG-C (T)

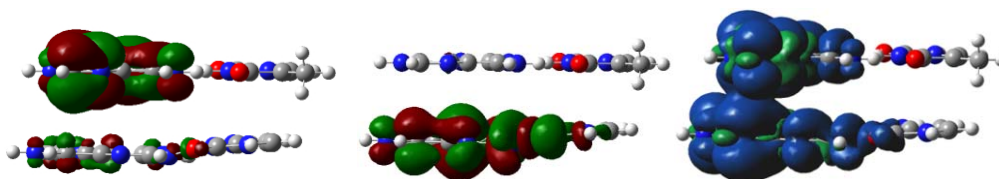

**Figure S3.** SOMOs / spin density maps for open-shell singlet states and open-shell triplet of the overlap-stacking trans-r-base pairs in 3'-r-purine/5'-r-purine model.

A-rT/A-rT (BS)

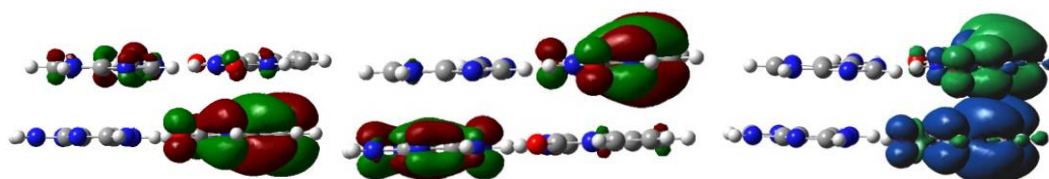

A-rT/G-rC (BS)

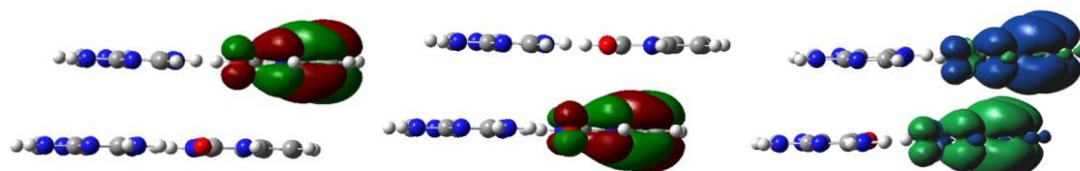

G-rC/G-rC (BS)

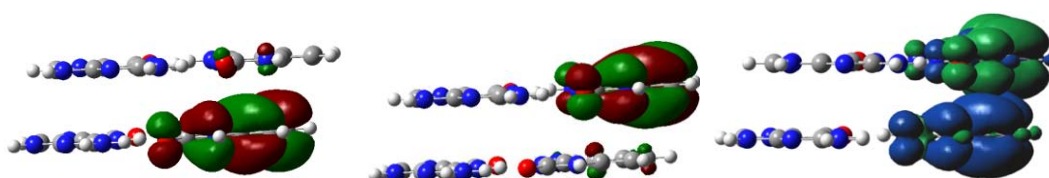

G-rC/A-rT (BS)

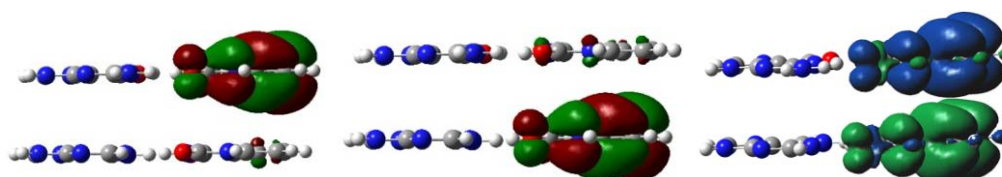

**Figure S4.** SOMOs / spin density maps for open-shell singlet states of the over-stacking trans-r-base pairs in 3'-r-pyrimidine/5'-r-pyrimidine model.

rG-C/rC-G (BS)

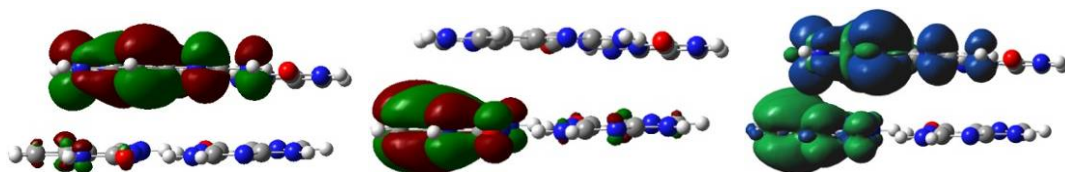

rG-C/rT-A (BS)

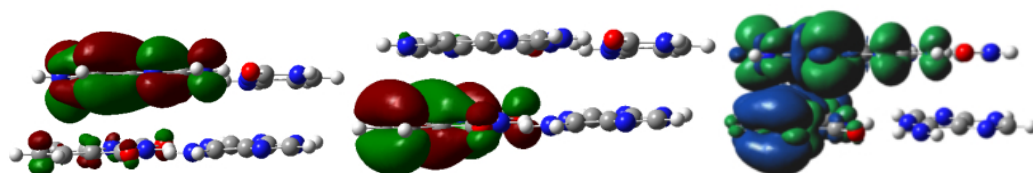

rA-T/rC-G (BS)

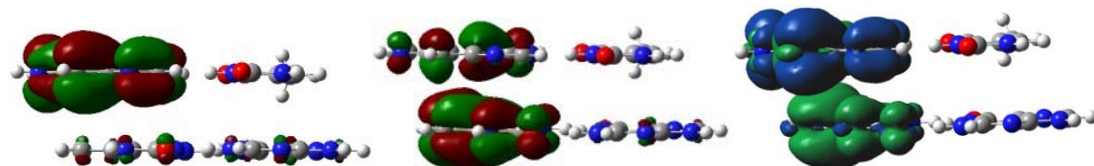

**Figure S5.** SOMOs / spin density maps for open-shell singlet states of the over-stacking trans-r-base pairs in 3'-r-purine-5'-r-pyrimidine model.

rC-G /rG-C (BS)

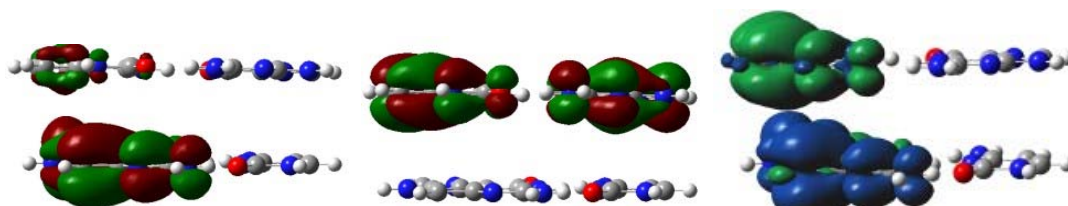

rC-G/rA-T (BS)

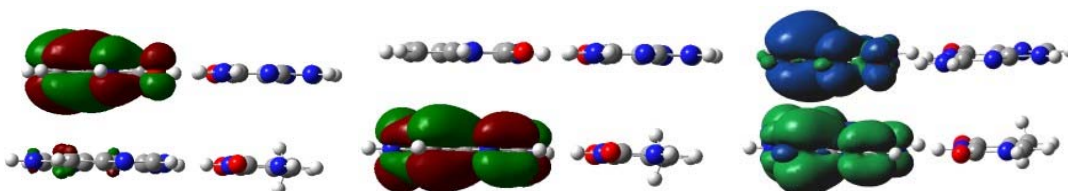

rT-A/ rA-T (BS)

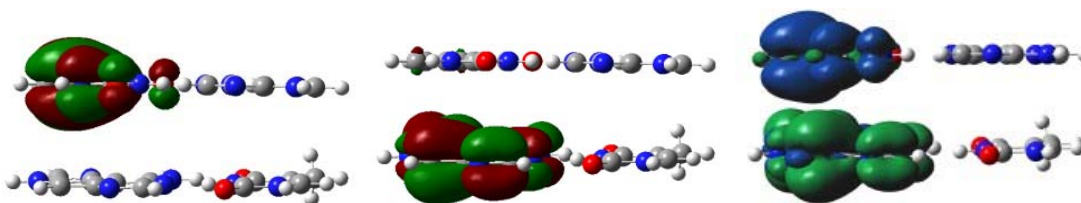

rT-A/rG-C(BS)

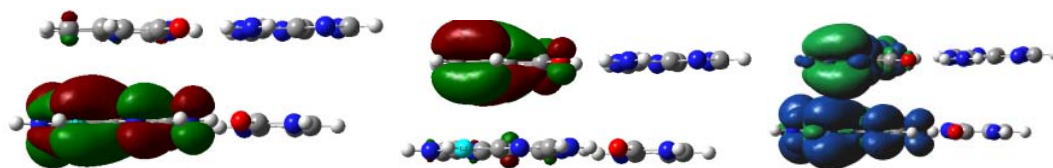

**Figure S6.** SOMOs / spin density maps for open-shell singlet states of the over-stacking trans-r-base pairs in 3'-r-pyrimidine-5'-r-purine model.

## Spin Densities Distributions in Cross-Stacking Diradical Base Pairs.

rG-C/C-rG (BS)

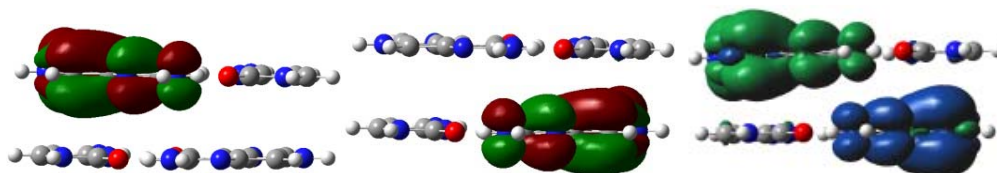

rG-C/T-rA (BS)

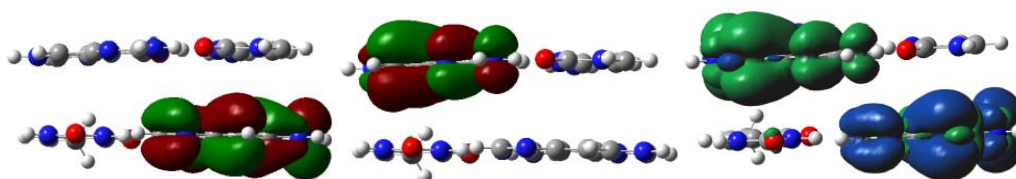

rA-T/T-rA (BS)

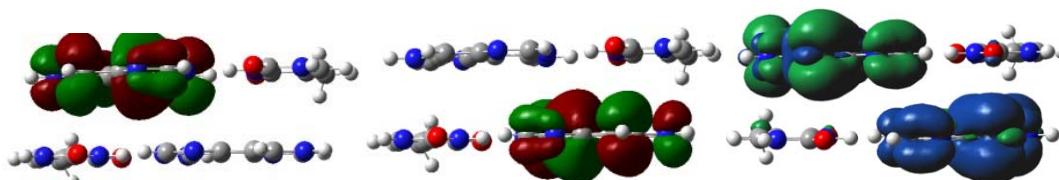

**Figure S7.** SOMOs / spin density maps for open-shell singlet states of the cross-stacking trans-r-base pairs in 3'-r-purine/3'-r-purine model.

G- rC /rC-G(BS)

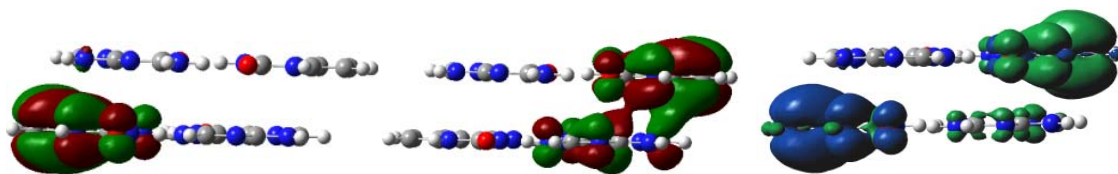

G-rC/rT-A(BS)

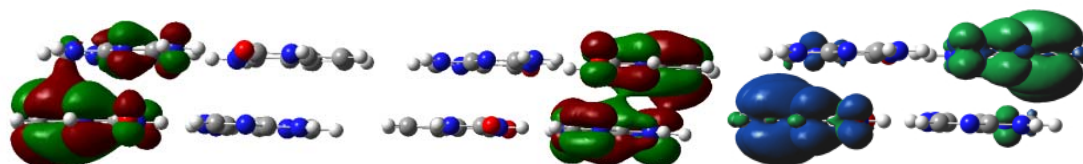

A-rT/rT-A(BS)

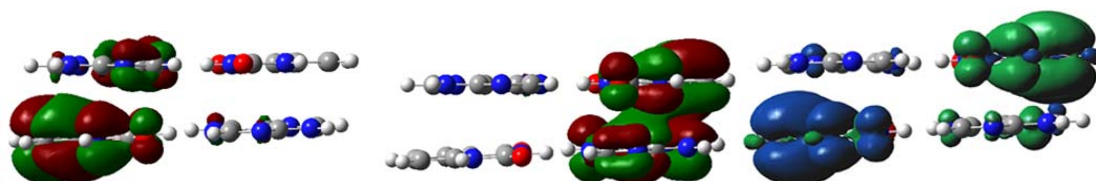

**Figure S8.** SOMOs / spin density maps for open-shell singlet states of the cross-stacking trans-r-base pairs in 5'-r-pyrimidine/5'-r-pyrimidine model.

rT-A /A-rT(BS)

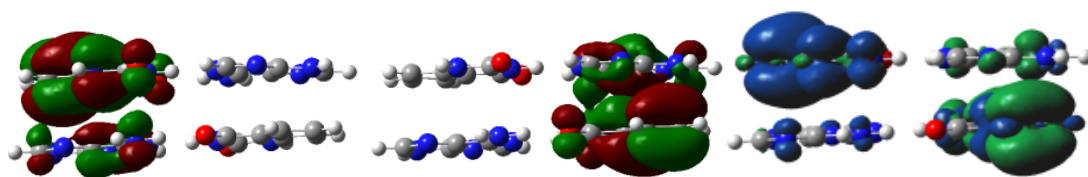

rC-G /A-rT(BS)

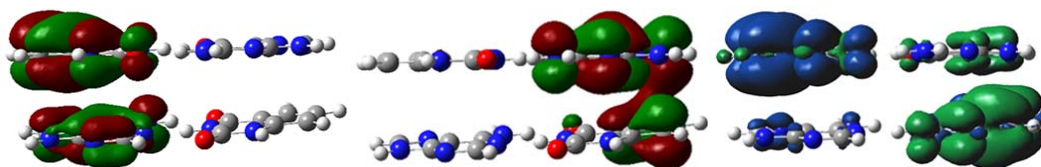

rC-G /G-rC(BS)

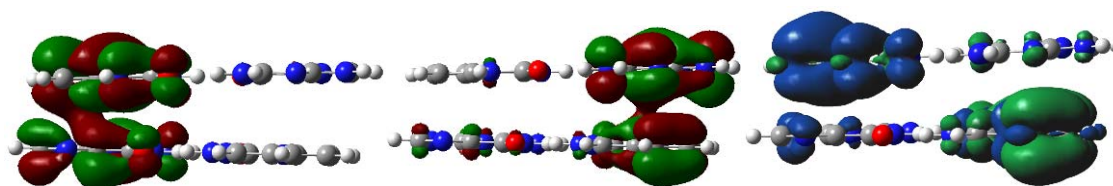

**Figure S9.** SOMOs / spin density maps for open-shell singlet states of the cross-stacking trans-r-base pairs in 3'-r-pyrimidine/3'-r-pyrimidine model.



rA-T/A-rT (BS)

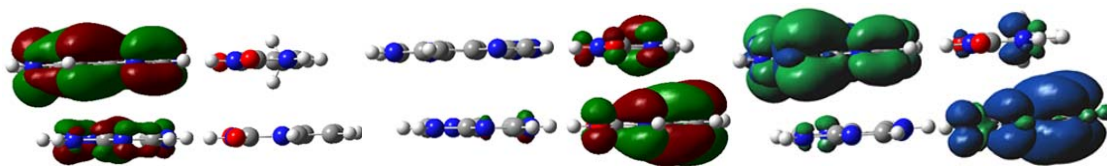

rA-T/G-rC (BS)

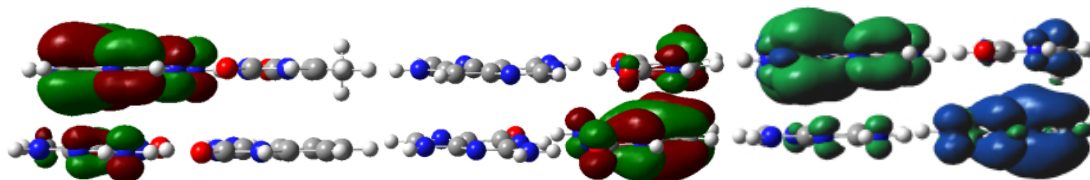

rG-C/A-rT (BS)

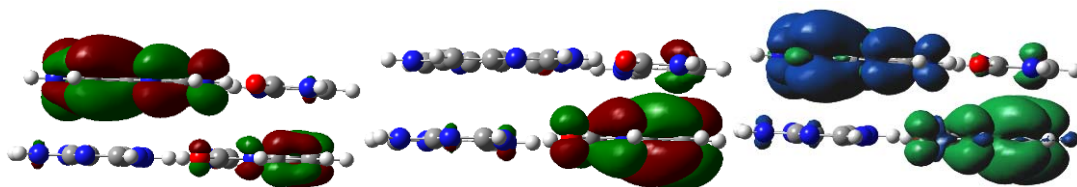

rG-C/G-rC (BS)

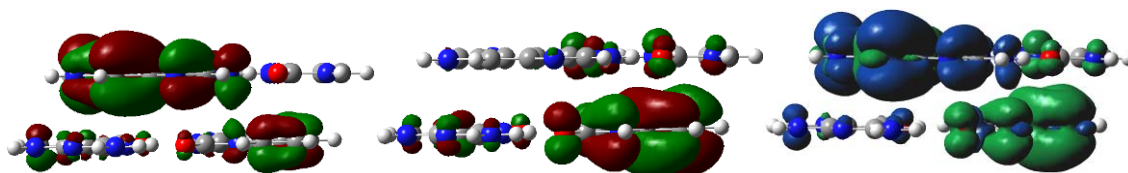

**Figure S10.** SOMOs / spin density maps for open-shell singlet states of the cross-stacking trans-r-base pairs in 3'-r-purine/3'-r-pyrimidine model.

A-rT/ rG-C (BS)

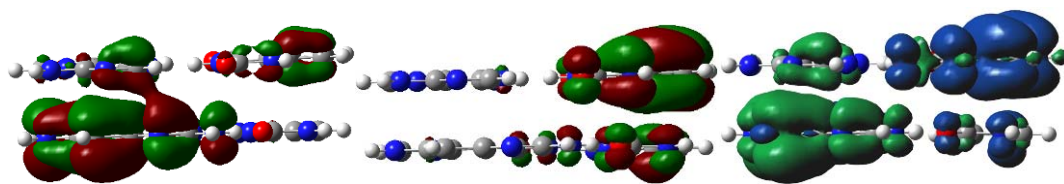

A-rT/ rA-T (BS)

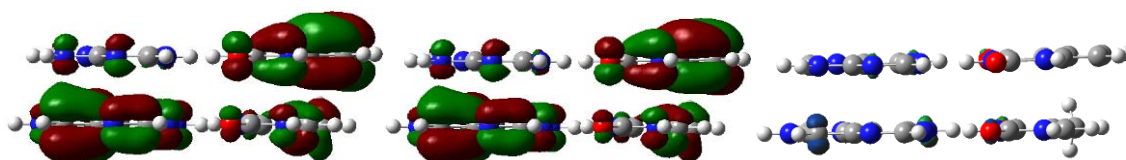

G-rC/ rG-C (BS)

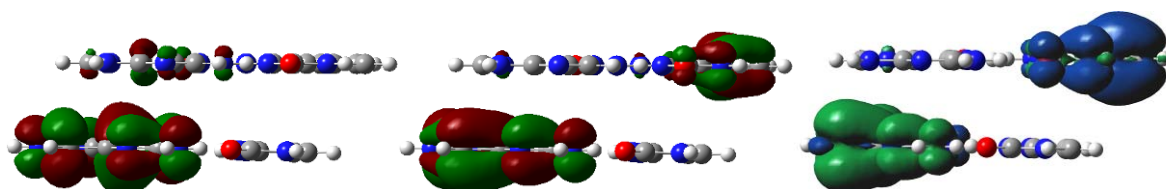

**Figure S11.** SOMOs / spin density maps for open-shell singlet states of the cross-stacking trans-r-base pairs in 5'-r-pyrimidine/5'-r-purine model.

C-rG/rG-C (BS)

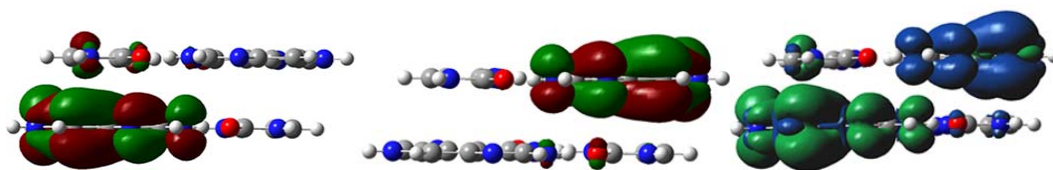

C-rG/rA-T (BS)

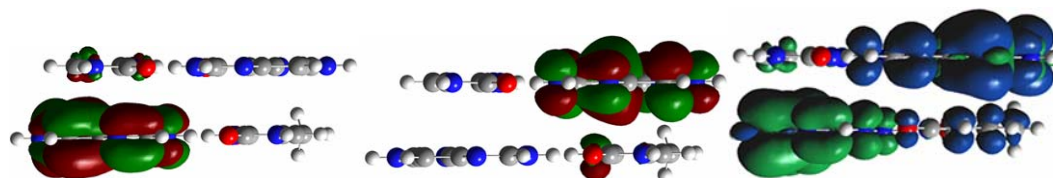

T-rA/rA-T (BS)

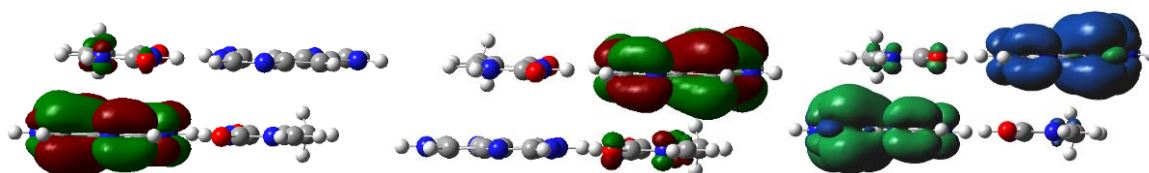

**Figure S12.** SOMOs / spin density maps for open-shell singlet states of the cross-stacking trans-r-base pairs in 5'-r-purine/5'-r-purine model.

rG-rC/ rG-rC (BS)

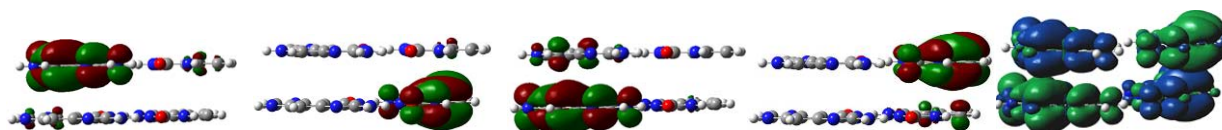

rC-rG/ rG-rC (BS)

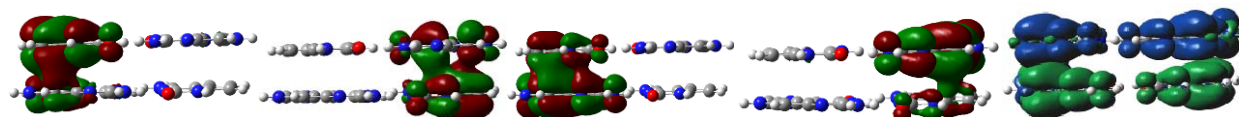

**Figure S13.** SOMOs / spin density maps for open-shell singlet states of tetra-radical trans-r-base pairs.

rG-rC/ rT-rA (BS)

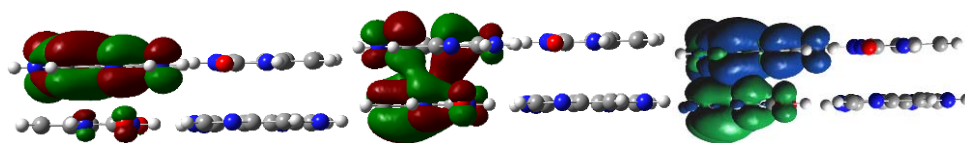

rA-rT/ rG-rC (BS)

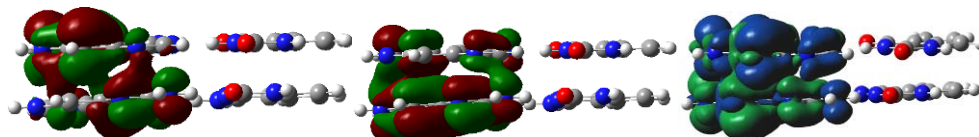

rC-rG/ rA-rT (BS)

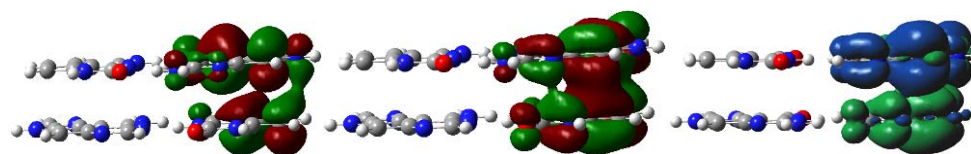

rT-rA/ rA-rT (BS)

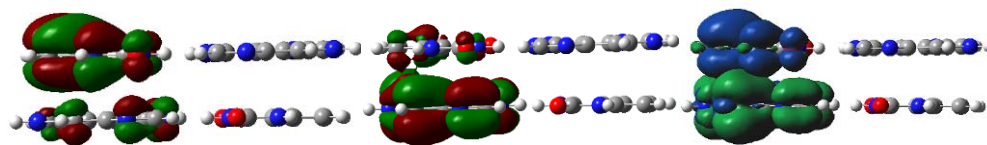

rG-rC/ rA-rT (BS)

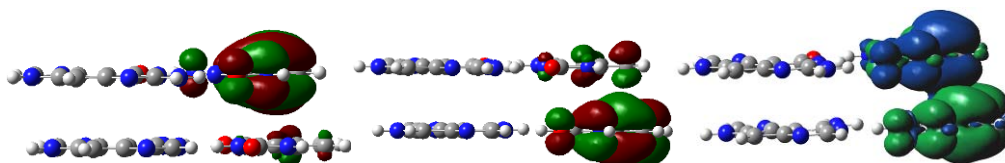

rG-rC /rC-rG (BS)

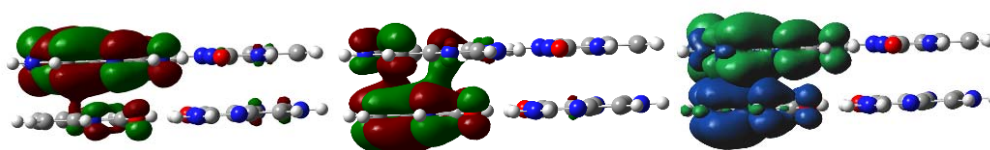

**Figure S14.** SOMOs / spin density maps for open-shell singlet states of diradical trans-r-base pairs.

| BPs       | UB3LYP/6-311++G** |               |              | UM062X/6-311++G** |               |              |
|-----------|-------------------|---------------|--------------|-------------------|---------------|--------------|
|           | SOMO- $\alpha$    | SOMO- $\beta$ | Spin Density | SOMO- $\alpha$    | SOMO- $\beta$ | Spin Density |
| rT-A/rA-T |                   |               |              |                   |               |              |
| rT-A/rG-C |                   |               |              |                   |               |              |
| rC-G/G-rC |                   |               |              |                   |               |              |
| rA-T/T-rA |                   |               |              |                   |               |              |
| rC-G/rA-T |                   |               |              |                   |               |              |
| C-rG/rG-C |                   |               |              |                   |               |              |
| A-rT/G-rC |                   |               |              |                   |               |              |
| T-rA/rA-T |                   |               |              |                   |               |              |

**Figure S15.** SOMOs / spin density maps for open-shell singlet states of part diradical trans-r-base pairs used with UB3LYP/6-311++G\*\* and UM062X/6-311++G\*\* Method.
